# Supplementary material
Source: PubMed Central journal article supplement (PMC3147416)
Supplement: EC.00006-11_1.pdf [file EC.00006-11_1.pdf]

Table S1. Oligonucleotides

|                        |                                |
|------------------------|--------------------------------|
| 5' <i>KAR2</i> probe   | 5' GCATACCCTTCAAGAATCACACG 3'  |
| 3' <i>KAR2</i> probe   | 5' GCTCGTCGTGGCTGAAAGG 3'      |
| 5' <i>OST2</i> probe   | 5' ATGCATGCCGAGTGGACAGG 3'     |
| 3' <i>OST2</i> probe   | 5' CTTCTCATCTATACACATCTAGC 3'  |
| 5' <i>ALG7</i> qRT-PCR | 5' CGATTACCTTCATTTCGATGCGG 3'  |
| 3' <i>ALG7</i> qRT-PCR | 5' GAGAATGGTGAGATTTGTGGACG 3'  |
| 5' <i>KAR2</i> qRT-PCR | 5' CAGGAGGCTGAGGAGTTCG 3'      |
| 3' <i>KAR2</i> qRT-PCR | 5' AAGTGATAGGAGCAACGGTAGC 3'   |
| 5' <i>OST2</i> qRT-PCR | 5' CCTTCGCTGGAGGGTTCG 3'       |
| 3' <i>OST2</i> qRT-PCR | 5' CTGCAAATGCTCGTTCTTGG 3'     |
| 5' <i>SSS1</i> qRT-PCR | 5' CCTCAGCAGACGAATACAAGC 3'    |
| 3' <i>SSS1</i> qRT-PCR | 5' GCCAACCAAGATGTTGTTAATAGG 3' |
| 5' <i>ACT1</i> qRT-PCR | 5' CTCTATCATGAAGTGTGATCTCG 3'  |
| 3' <i>ACT1</i> qRT-PCR | 5' CATACGGTCGGCAATACC 3'       |
